# Supplementary material for: Optimization of Pectin Extraction from an indigenous variety of Musa acuminata peel from Karnataka using Response Surface Methodology
Source: Research Square preprint supplement (doi:10.21203/rs.3.rs-7171947/v1), 2025-08-13
Supplement: Supplementary file 1 [file 661689e773ea25e470190e12.docx]

**Supplementary Material**

| **Factor** | **Coefficient Estimate** | **df** | **Standard Error** | **95% CI Low** | **95% CI High** | **VIF** |
| --- | --- | --- | --- | --- | --- | --- |
| Intercept | 1.98 | 1 | 0.0253 | 1.93 | 2.04 |  |
| A-Conc | 0.1473 | 1 | 0.0341 | 0.0713 | 0.2233 | 1.93 |
| B-Time | -0.0966 | 1 | 0.0341 | -0.1726 | -0.0206 | 2.11 |
| C-Temp. | 0.0468 | 1 | 0.0341 | -0.0292 | 0.1228 | 2.16 |
| AB | -0.4711 | 1 | 0.0475 | -0.5769 | -0.3653 | 2.07 |
| AC | -0.0689 | 1 | 0.0481 | -0.1761 | 0.0382 | 2.14 |
| BC | -0.0499 | 1 | 0.0438 | -0.1475 | 0.0476 | 2.13 |
| A² | -0.1866 | 1 | 0.0250 | -0.2423 | -0.1309 | 1.04 |
| B² | -0.2123 | 1 | 0.0249 | -0.2679 | -0.1568 | 1.04 |
| C² | -0.3053 | 1 | 0.0249 | -0.3609 | -0.2498 | 1.04 |

**Table 1** Regression coefficients of the quadratic model expressed in terms of coded factors, along with their Degrees of Freedom (df), Standard Errors, Confidence Intervals (95%), and Variance Inflation Factors (VIF)
